# Supplementary material
Source: publisher figshare collection journal article supplement (https://sage.figshare.com/ndownloader/files/14862242)
Supplement: Supplementary file 1 [file 14862242]

## **EXPLORING THE F3 GENERATION**

### **INTERVIEW TOPIC GUIDE FOR GROUP A, B AND C**

#### **1) Group C – narrative only**

- Tell me about how did you come to take an F3 year?
- Tell me about your F3 year?
- What are your plans ongoing for the next few years after your F3 year?
- How did you feel when you ended your F2 post? (looking for impact of transitions)

#### **2) Group A/B narrative interview with semi structured prompts**

- Tell me about your F3 year?
- How did you feel when you ended your F2 post? (looking for impact of transitions)
- What has been the major impact on you of taking a F3 year (career choices, new experiences, general health etc.)
- What did you do after your F3 year?
- (If appropriate) what was the impact of your F3 on going back into specialty training? (checking again for transitions)
- What were your motivations behind taking an F3?
  - Career based
  - Personal
  - Travel
- What contributed to your decision not to go directly into specialty training?
- Did you have any experiences in F2 that meant that you did not want to continue directly onto the next stage of training?
- Are there any barriers to you re-entering formal specialty training?
- Have you come across any logistical problems or disadvantages in doing an F3?
- What is the general opinion of your peers about taking an F3?

#### **3) Concluding prompt for Groups B and C**

What advice would you give to someone in F2 deciding whether to take an F3?
